# Supplementary material for: Radiologic Analysis of Causes of Early Recurrence after Percutaneous Endoscopic Transforaminal Discectomy
Source: Research Square preprint supplement (doi:10.21203/rs.3.rs-944800/v1), 2021-10-05
Supplement: Supplementary file 1 [file 7fb9f3e3e952ded461ecf97b.xlsx]

## Sheet: Sheet1
	Table 3. Multivariate logistic regression analysis
	Radiologic factor	Regression coefficient	Wald x2	Odds ratio (OR)	95% confidence interval (CI)	P-value
	Central/Paracentral	−2.659	5.281	0.07	0.007–0.676	0.022
	Disc height index	−13.230	3.145	0	0.000–4.024	0.076
	Base-width of herniation	0.32	18.668	1.377	1.191–1.593	0
	Postoperative annulus-fibrosus tear	0.086	3.558	1.175	0.994–1.390	0.059
