# Supplementary material for: Radiologic Analysis of Causes of Early Recurrence after Percutaneous Endoscopic Transforaminal Discectomy
Source: Research Square preprint supplement (doi:10.21203/rs.3.rs-944800/v1), 2021-10-05
Supplement: Supplementary file 2 [file a52856ab7c111d448f2a4c1d.xlsx]

## Sheet: Sheet1
	Table 2. Comparison of radiologic data between early recurrence and non-early recurrence groups of patients
	Influencing factor	Early recurrence	Non-early recurrence	P-value
		(n=19)	(n=266)
	Degree of intervertebral disc degeneration			0.036
	Grade I	0	19
	Grade II	2	61
	Grade III	8	109
	Grade IV	9	75
	Grade V	0	2
	Intervertebral disc herniation site			0.032
	Far lateral	3	23
	Paracentral	1	77
	Central	12	96
	Foraminal	3	70
	Disc height index	26.46±4.56	28.70±4.07	0.022
	Sagittal range of motion	4.80±2.59	5.73±2.34	0.1
	Base-width (mm)	17.98±4.33	13.71±3.67	0
	Postoperative annulus-fibrosus tear (mm)	15.80±3.42	13.02±3.92	0.003
