# Supplementary material for: Radiologic Analysis of Causes of Early Recurrence after Percutaneous Endoscopic Transforaminal Discectomy
Source: Research Square preprint supplement (doi:10.21203/rs.3.rs-944800/v1), 2021-10-05
Supplement: Supplementary file 3 [file c21a3e299915dda684c957c0.xlsx]

## Sheet: Sheet1
	Table 1 Comparison of General data between early recurrence and non-early recurrence groups of patients
	Variable	Early recurrence	Non-early recurrence	P-value
	Age	57.16±13.29	54.73±12.82	0.428
	Sex			0.13
	Men	9	153
	Women	10	113
	BMI	21.65±1.74	21.77±1.42	0.733
	VAS
	Preoperative	7.37±0.83	7.38±0.78	0.936
	Postoperative	2.84±0.90	2.73±0.90	0.596
	Levels			0.992
	L2/3	0	1
	L3/4	2	31
	L4/5	16	221
	L5/S1	1	13
